# Supplementary material
Source: HighWire-hosted journal article supplement (https://nutrition.bmj.com/content/4/1/181)

**Figure 1: Flow diagram showing subjects initially enrolled, intervened, followed up and included in the analyses in the quasi experimental study.**

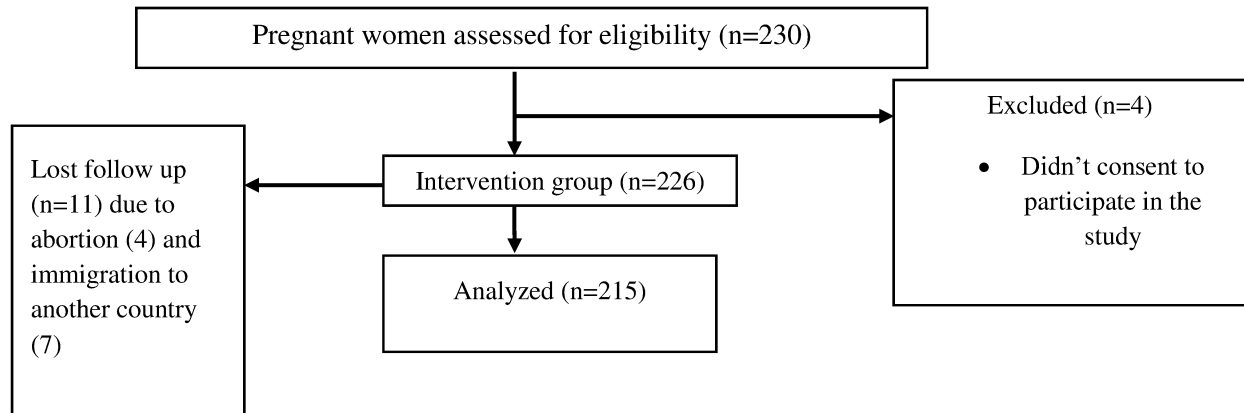

Supplement: inline-supplementary-material-4 [file inline-supplementary-material-4.pdf]
